# Supplementary material for: Investigation of rotameric conformations of substituted imidazo-[1,2-a]pyrazine: experimental and theoretical approaches
Source: Royal Society of Chemistry journal article supplement (doi:10.1039/c7ra13617j), 2018-01-01
Supplement: c7ra13617j1.pdf [file c7ra13617j1.pdf]

*Supporting Information for*

**Investigation of rotameric conformations of substituted imidazo- [1, 2-a] pyrazine: experimental and theoretical approaches**

Gulshan Kumar, Richa Goel, Kamaldeep Paul and Vijay Luxami\*

*School of Chemistry and Biochemistry, Thapar University, Patiala, Punjab, India*

*E-mail: vluxami@thapar.edu*

|                   | <b>Content</b>                                                                                                                                                                                                               | <b>Page No.</b> |
|-------------------|------------------------------------------------------------------------------------------------------------------------------------------------------------------------------------------------------------------------------|-----------------|
| <b>Figure S1</b>  | <sup>1</sup> H NMR spectra of Compound <b>1A</b>                                                                                                                                                                             | 2               |
| <b>Figure S2</b>  | <sup>13</sup> C NMR spectra of Compound <b>1A</b>                                                                                                                                                                            | 2               |
| <b>Figure S3</b>  | Mass spectra of compound <b>1A</b>                                                                                                                                                                                           | 3               |
| <b>Figure S4</b>  | FTIR spectra of compound <b>1A</b>                                                                                                                                                                                           | 3               |
| <b>Figure S5</b>  | <sup>1</sup> H NMR spectra of Compound <b>1B</b>                                                                                                                                                                             | 4               |
| <b>Figure S6</b>  | <sup>13</sup> C NMR spectra of Compound <b>1B</b>                                                                                                                                                                            | 4               |
| <b>Figure S7</b>  | Mass spectra of compound <b>1B</b>                                                                                                                                                                                           | 5               |
| <b>Figure S8</b>  | FTIR spectra of compound <b>1B</b>                                                                                                                                                                                           | 5               |
| <b>Figure S9</b>  | Experimental and theoretical <sup>1</sup> H NMR (left) and <sup>13</sup> C NMR (right) correlation for conformer <b>1B</b>                                                                                                   | 6               |
| <b>Table S1.</b>  | Experimental <sup>1</sup> H NMR signals for conformer <b>1A</b> and <b>1B</b>                                                                                                                                                | 6               |
| <b>Figure S10</b> | The absorption spectra of different compound <b>1A</b> and <b>1B</b> in CH <sub>3</sub> CN.                                                                                                                                  | 7               |
| <b>Table S2</b>   | The calculated absorption value for conformer <b>1A</b> and <b>1B</b> in gas and CH <sub>3</sub> CN solvent phase at B3LYP/6-31++G** level of theory, symmetry of frontier orbital and % contributions of Molecular orbitals | 7               |
| <b>Figure S11</b> | Frontier Molecular orbital for conformer <b>1B</b>                                                                                                                                                                           | 8               |
| <b>Figure S12</b> | <sup>1</sup> H NMR spectra of Compound <b>2A</b>                                                                                                                                                                             | 9               |
| <b>Figure S13</b> | <sup>13</sup> C NMR spectra of Compound <b>2A</b>                                                                                                                                                                            | 9               |
| <b>Figure S14</b> | Mass spectra of compound <b>2A</b>                                                                                                                                                                                           | 10              |
| <b>Figure S15</b> | FTIR Spectra of compound <b>2A</b>                                                                                                                                                                                           | 11              |
| <b>Figure S16</b> | Experimental and theoretical <sup>1</sup> H NMR (left) and <sup>13</sup> C NMR (right) correlation for conformer <b>2A</b>                                                                                                   | 11              |
| <b>Figure S17</b> | <sup>1</sup> H NMR spectra of Compound <b>2B</b>                                                                                                                                                                             | 12              |
| <b>Figure S18</b> | <sup>13</sup> C NMR spectra of Compound <b>2B</b>                                                                                                                                                                            | 12              |
| <b>Figure S19</b> | Mass spectra of compound <b>2B</b>                                                                                                                                                                                           | 13              |
| <b>Figure S20</b> | FTIR spectra of compound <b>2B</b>                                                                                                                                                                                           | 13              |
| <b>Table S3</b>   | Experimental <sup>1</sup> H NMR signals for conformer <b>2A</b> and <b>2B</b>                                                                                                                                                | 14              |
| <b>Figure S21</b> | The absorption spectra of different conformers <b>2A</b> and <b>2B</b> in CH <sub>3</sub> CN.                                                                                                                                | 14              |
| <b>Table S4</b>   | The calculated absorption value for conformer <b>2A</b> and <b>2B</b> in gas and CH <sub>3</sub> CN solvent phase at B3LYP/6-31++G** level of theory, symmetry of frontier orbital and % contributions of Molecular orbitals | 15              |
| <b>Figure S22</b> | Frontier Molecular orbital for conformer <b>2B</b>                                                                                                                                                                           | 17              |

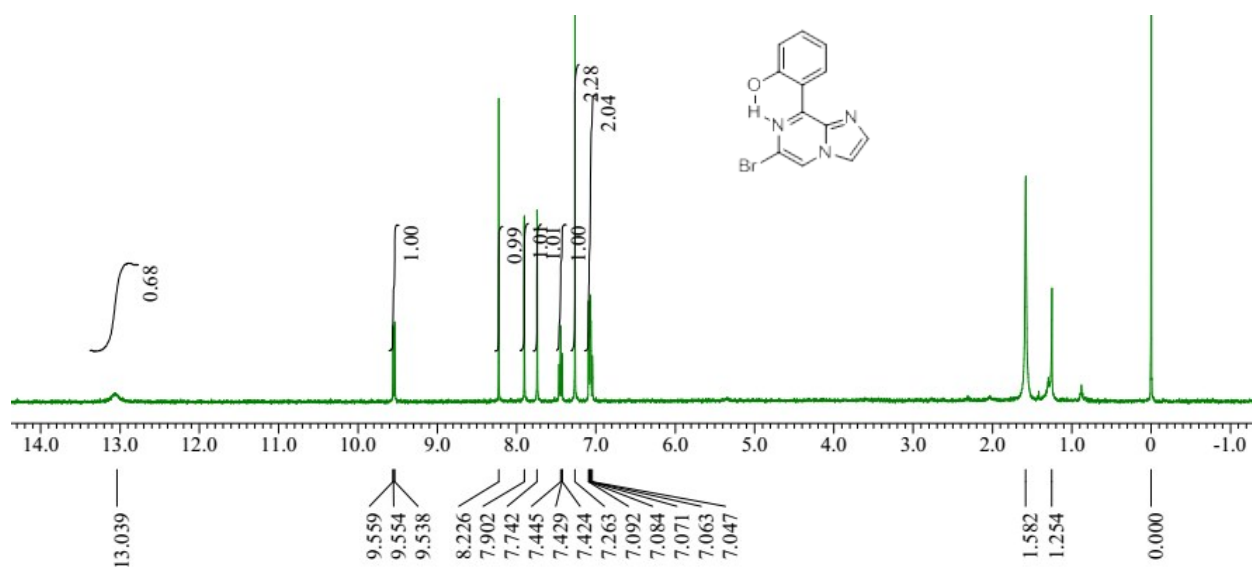

**Figure S1:**  $^1\text{H}$  NMR spectra of Compound **1A**

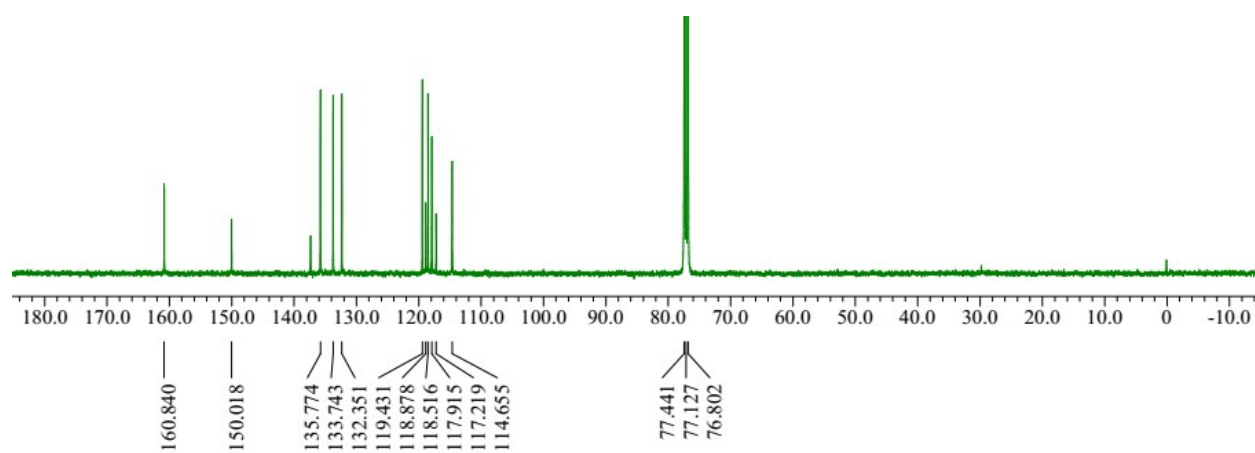

**Figure S2:**  $^{13}\text{C}$  NMR spectra of Compound **1A**

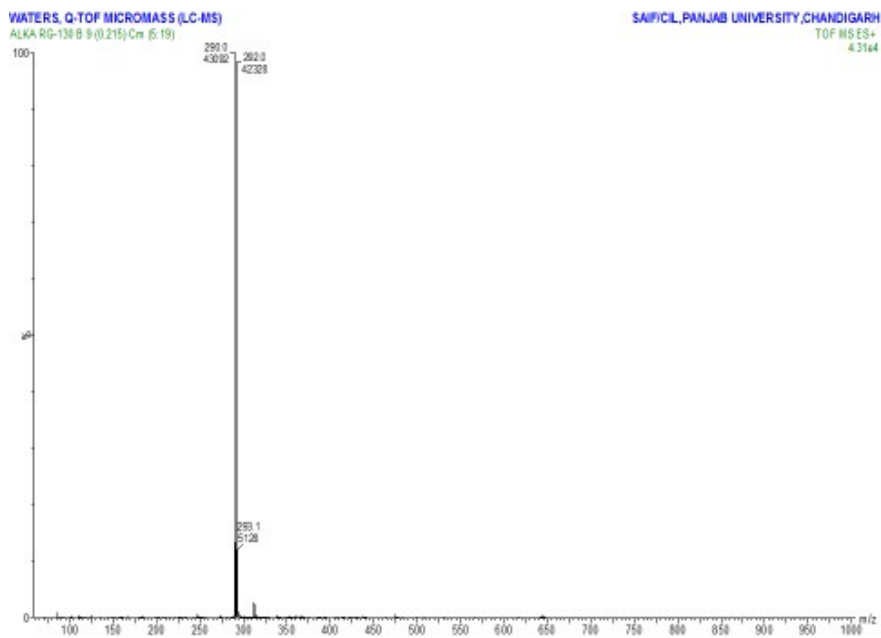

**Figure S3:** Mass spectra of compound 1A

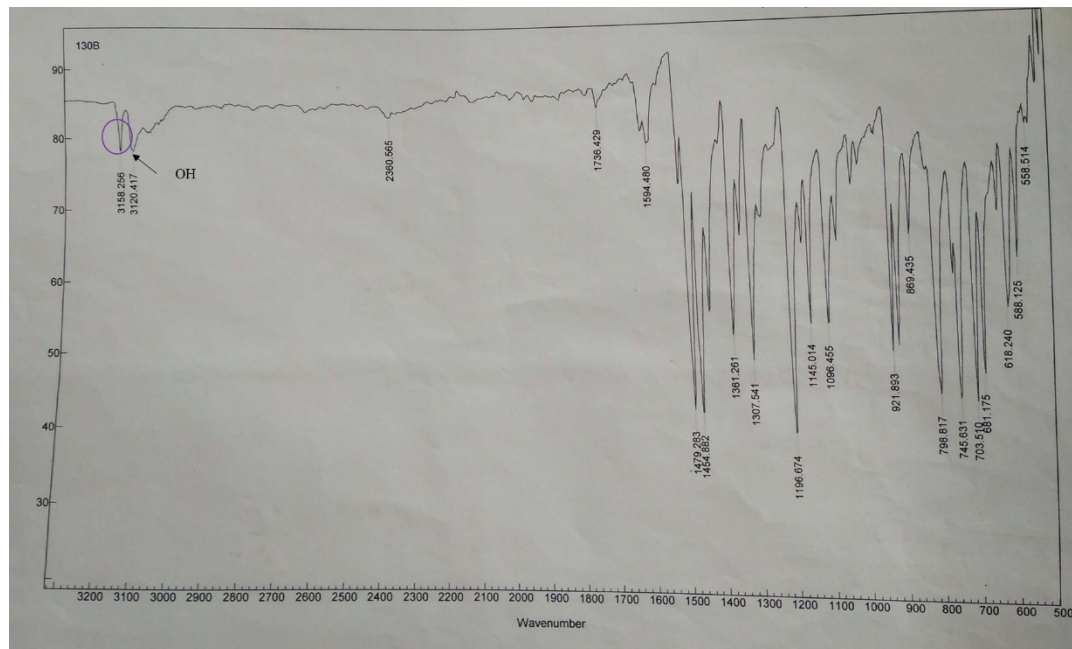

**Figure S4:** FTIR Spectra of compound 1A

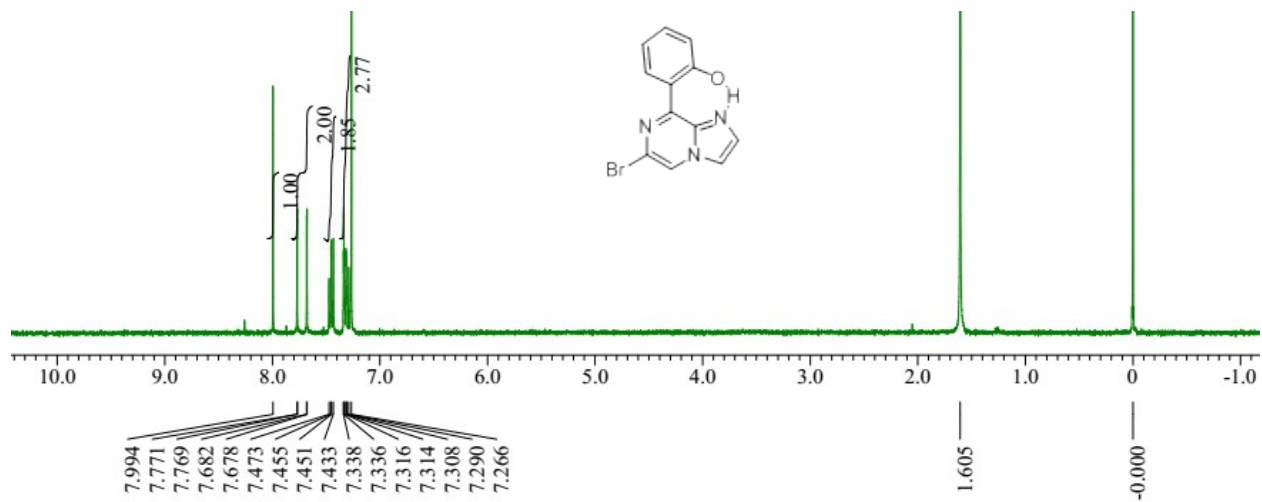

**Figure S5:**  $^1\text{H}$  NMR spectra of Compound **1B**

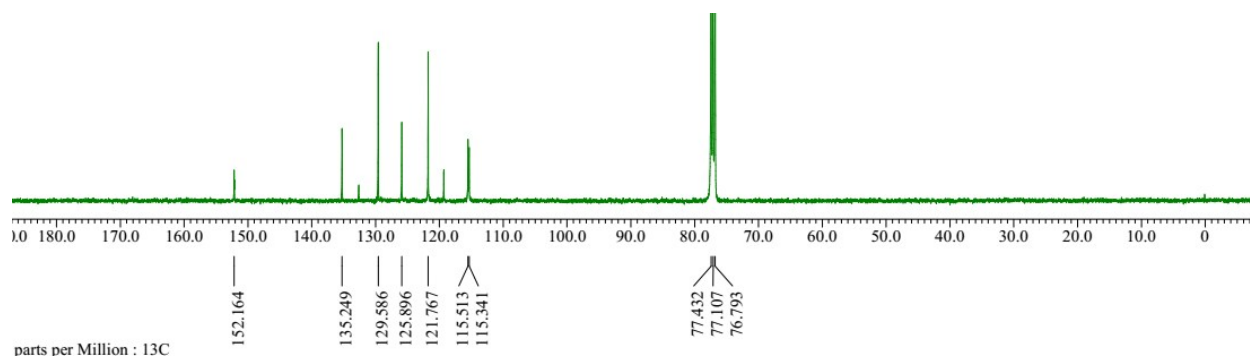

**Figure S6:**  $^{13}\text{C}$  NMR spectra of Compound **1B**

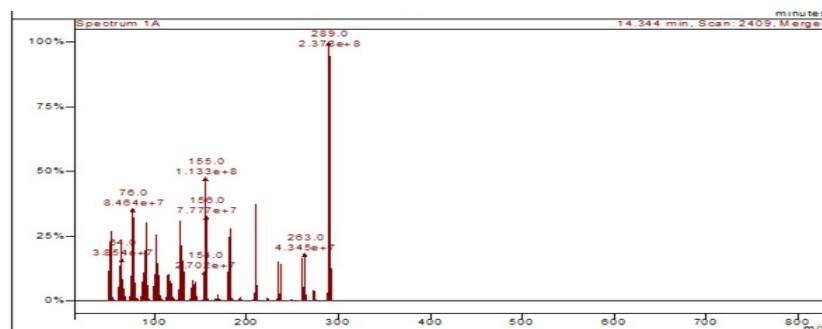

**Figure S7:** Mass spectra of compound **1B**

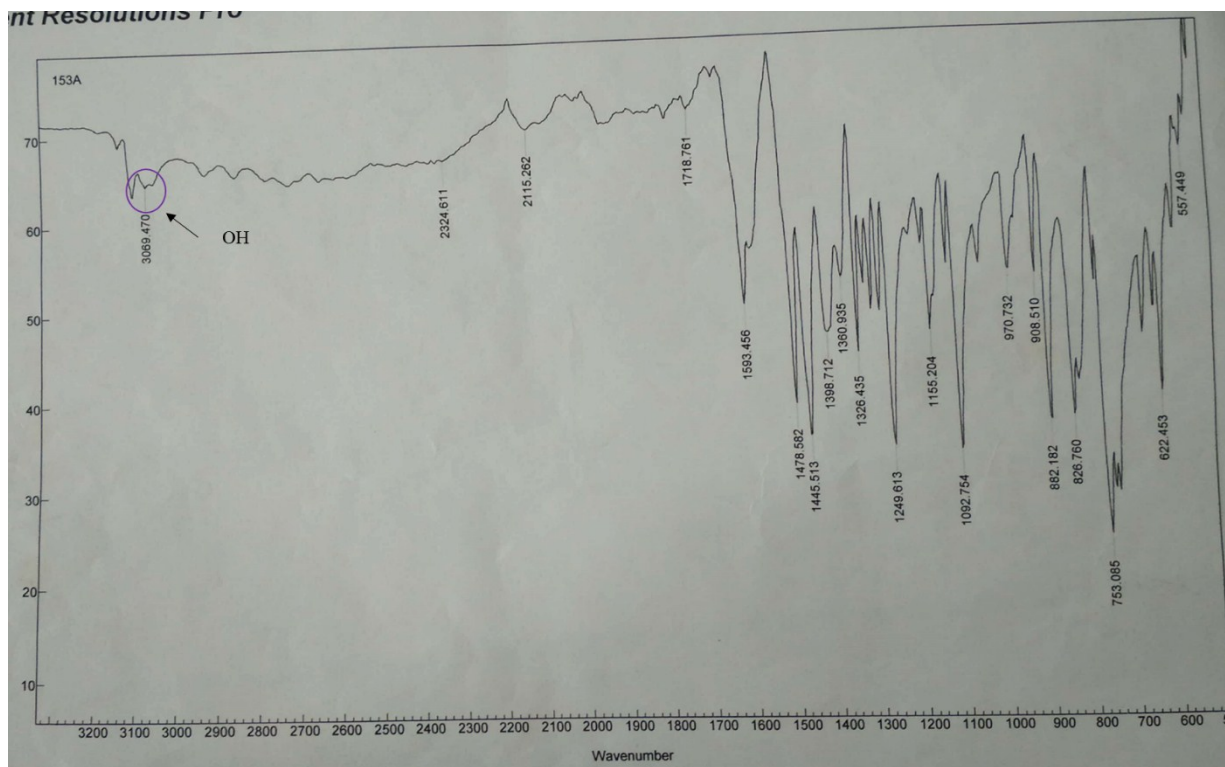

**Figure S8:** FTIR Spectra of compound **1B**

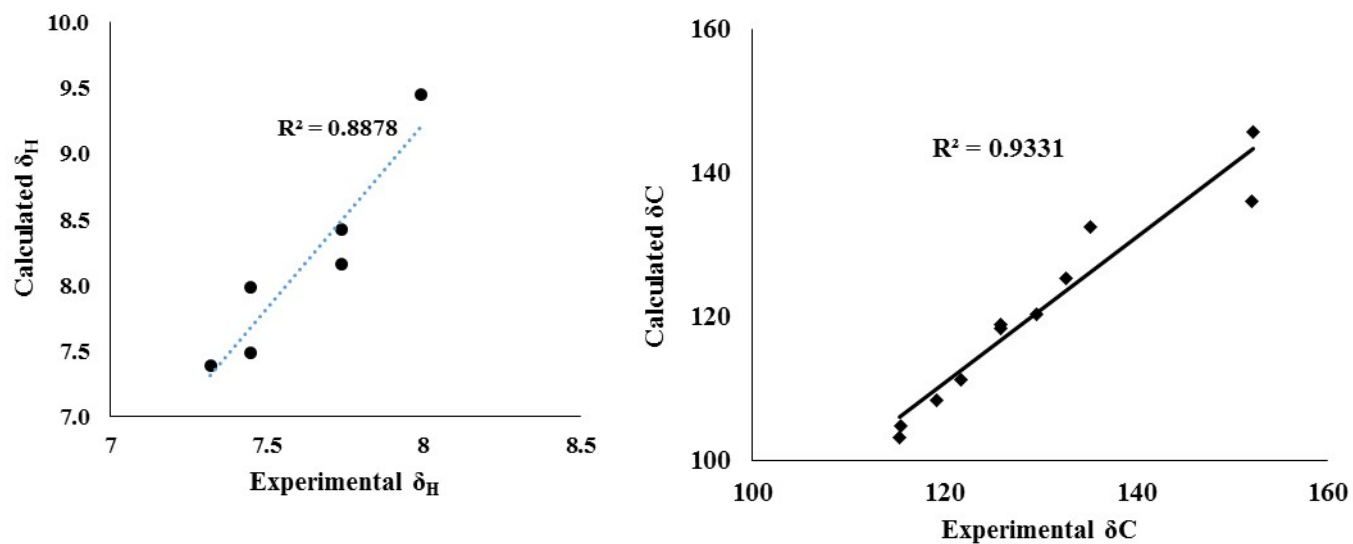

**Figure S9:** Experimental and theoretical  $^1\text{H}$  NMR (left) and  $^{13}\text{C}$  NMR (right) correlation for conformer **1B**

| <b>Table S1.</b> Experimental $^1\text{H}$ NMR signals for conformer <b>1A</b> and <b>1B</b> |                                                                                    |                                                                                      |
|----------------------------------------------------------------------------------------------|------------------------------------------------------------------------------------|--------------------------------------------------------------------------------------|
| <b>H- position</b>                                                                           | 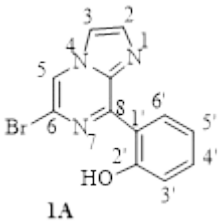 |  |
|                                                                                              | 13.03                                                                              |                                                                                      |
| 6'                                                                                           | 9.54                                                                               | 7.99                                                                                 |
| 5                                                                                            | 8.23                                                                               | 7.77                                                                                 |
| 2                                                                                            | 7.90                                                                               | 7.68                                                                                 |
| 3                                                                                            | 7.74                                                                               | 7.47                                                                                 |
| 4'                                                                                           | 7.45                                                                               | 7.43                                                                                 |
| 3'                                                                                           | 7.05                                                                               | 7.34                                                                                 |
| 5'                                                                                           | 7.09                                                                               | 7.29                                                                                 |



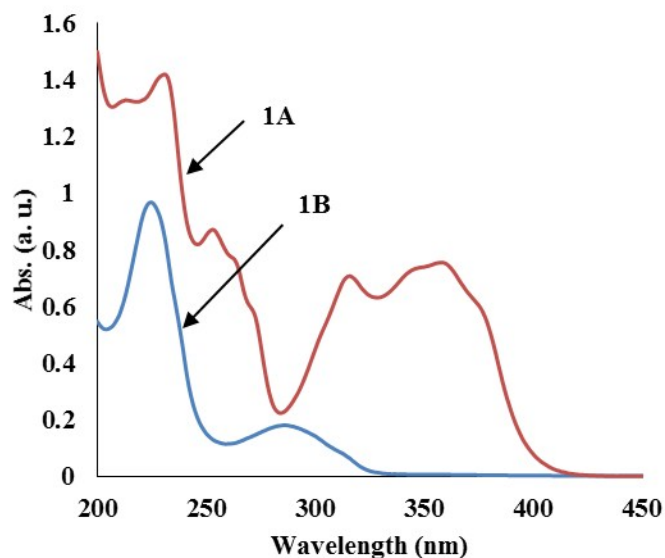

**Figure S10:** The absorption spectra of different compound **1A** and **1B** in  $\text{CH}_3\text{CN}$ .

**Table S2:** The calculated absorption value for conformer **1A** and **1B** in gas and  $\text{CH}_3\text{CN}$  solvent phase at B3LYP/6-31++G\*\* level of theory, symmetry of frontier orbital and % contributions of Molecular orbitals

| Excited State | $\lambda_{\text{ACN}}$ (nm) | $\lambda_{\text{Gas}}$ (nm) | $\lambda_{\text{Exp}}$ (nm) | Osc. Strength | Symmetry  | % Major Orbital Contribution |    |
|---------------|-----------------------------|-----------------------------|-----------------------------|---------------|-----------|------------------------------|----|
| <b>1A</b>     |                             |                             |                             |               |           |                              |    |
| $S_0-S_1$     | 370.20                      | 388.50                      | 380,                        | 0.2567        | Singlet-A | H→L                          | 94 |
| $S_0-S_2$     | 329.15                      | 326.29                      |                             | 0.1214        | Singlet-A | H-1→L                        | 89 |
| $S_0-S_3$     | 311.03                      | 309.84                      | 361,                        | 0.184         | Singlet-A | H-2→L                        | 86 |
| $S_0-S_4$     | 274.96                      | 281.59                      |                             | 0.0001        | Singlet-A | H-4→L                        | 96 |
| $S_0-S_5$     | 270.69                      | 281.16                      | 318                         | 0.155         | Singlet-A | H-3→L                        | 57 |
| $S_0-S_6$     | 262.13                      | 269.59                      |                             | 0.0688        | Singlet-A | H→L+1                        | 53 |
| <b>1B</b>     |                             |                             |                             |               |           |                              |    |
| $S_0-S_1$     | 381.54                      | 402.60                      | 290                         | 0.2699        | Singlet-A | H→L                          | 94 |
| $S_0-S_2$     | 333.23                      | 336.02                      |                             | 0.1178        | Singlet-A | H-1→L                        | 94 |
| $S_0-S_3$     | 300.16                      | 300.28                      |                             | 0.1204        | Singlet-A | H-2→L                        | 81 |
| $S_0-S_4$     | 280.89                      | 288.76                      |                             | 0.0006        | Singlet-A | H-4→L                        | 95 |
| $S_0-S_5$     | 278.85                      | 288.73                      |                             | 0.1195        | Singlet-A | H-3→L                        | 44 |
| $S_0-S_6$     | 265.55                      | 274.51                      |                             | 0.0294        | Singlet-A | H-3→L                        | 43 |

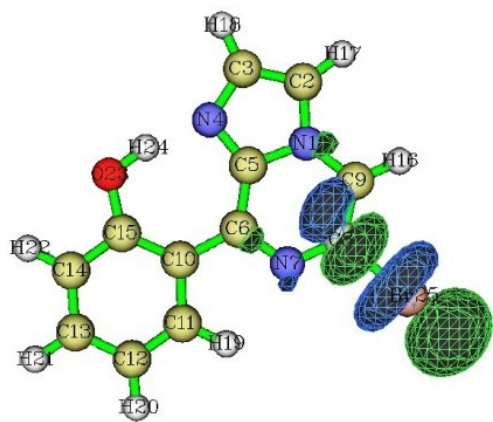

LUMO+2

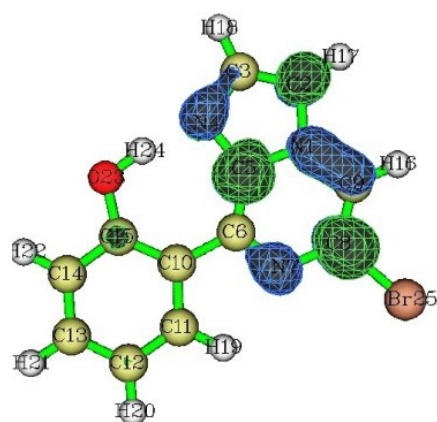

LUMO+1

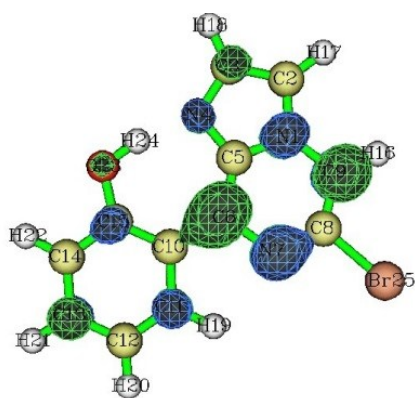

LUMO

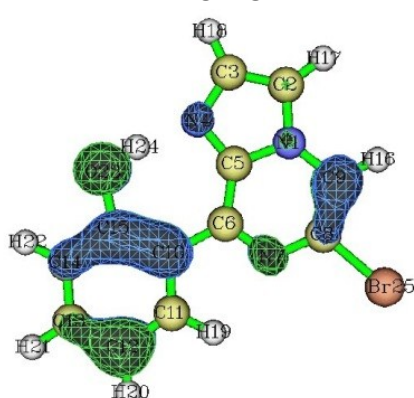

HOMO

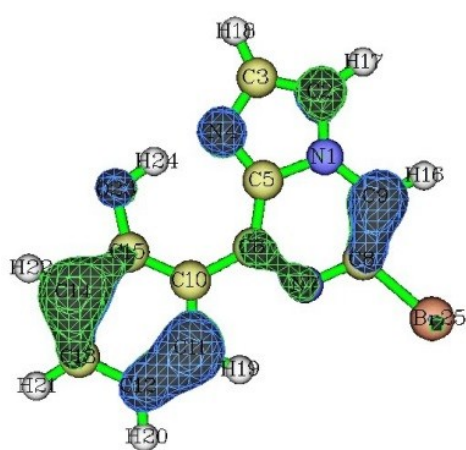

HOMO-1

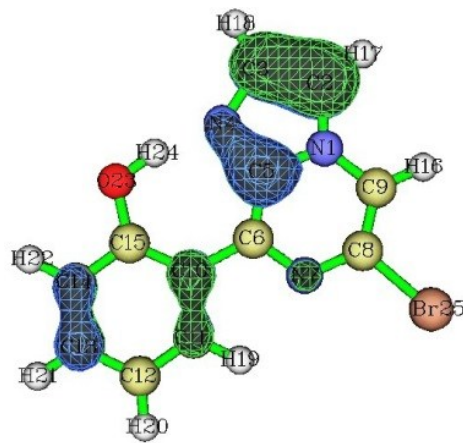

HOMO-2

Figure S11: Frontier Molecular orbital for conformer 1B

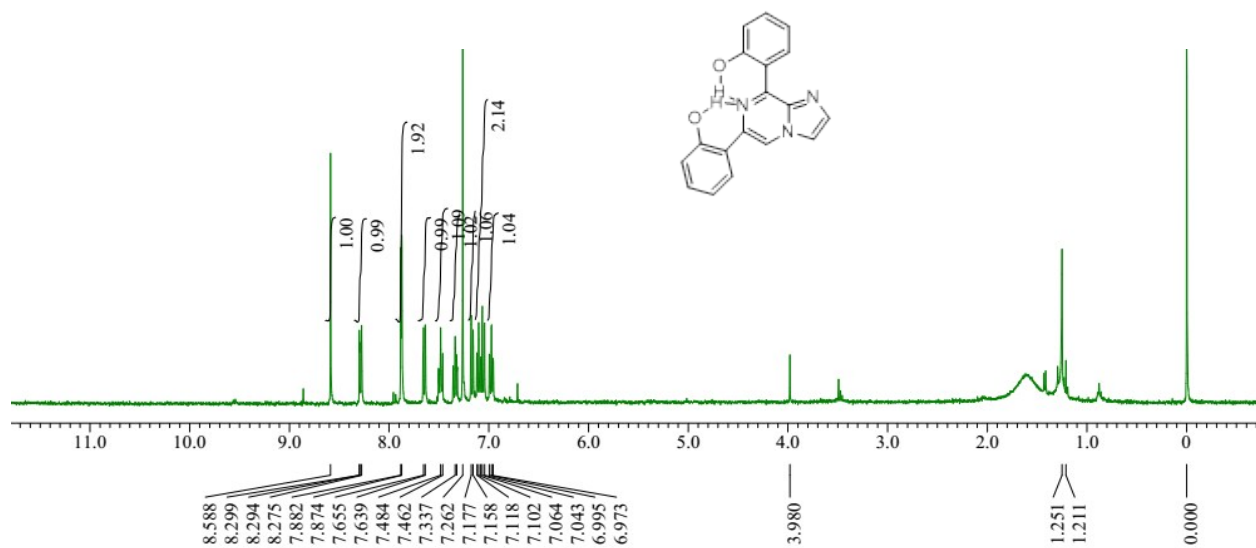

**Figure S12:**  $^1\text{H}$  NMR spectra of Compound 2A

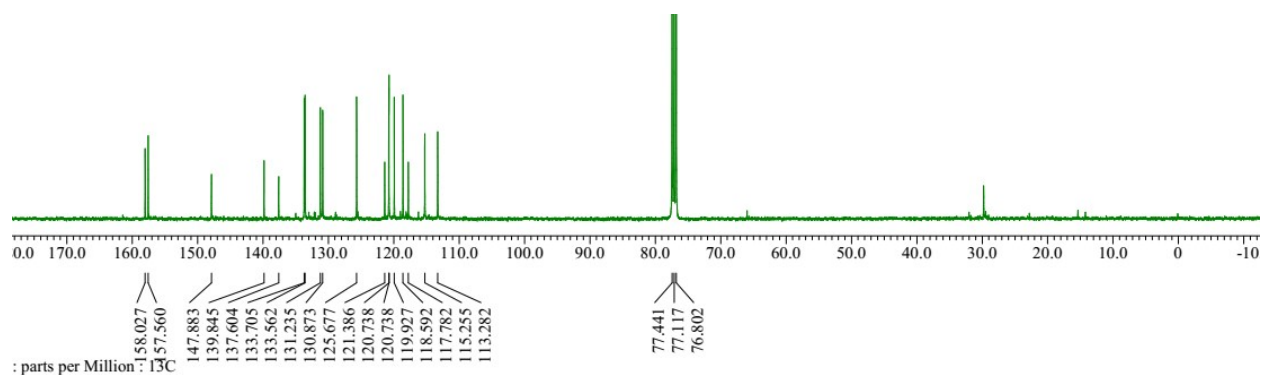

**Figure S13:**  $^{13}\text{C}$  NMR spectra of Compound 2A

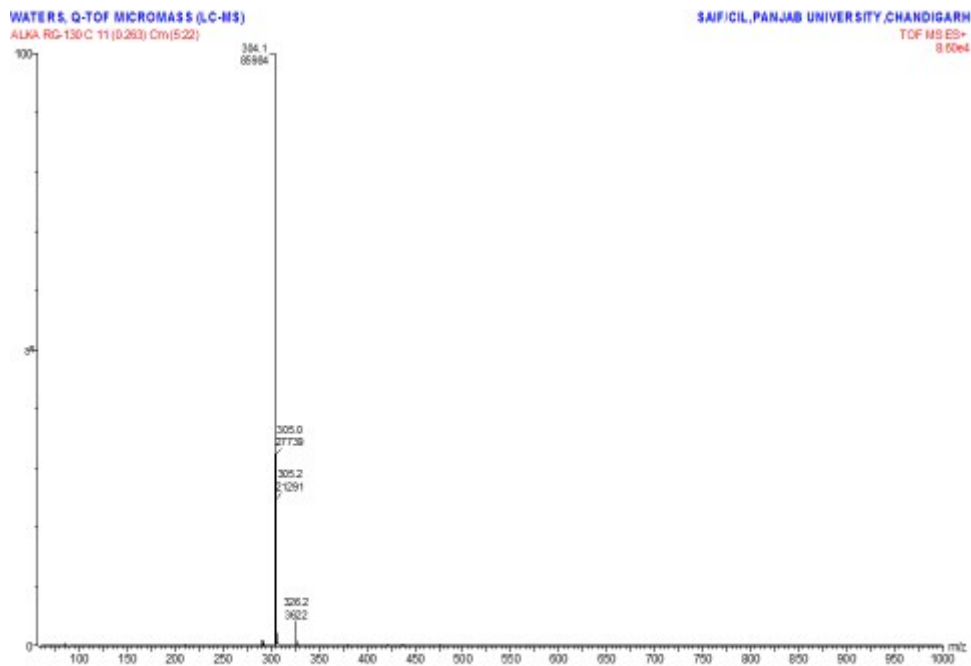

Figure S14: Mass spectra of compound 2A

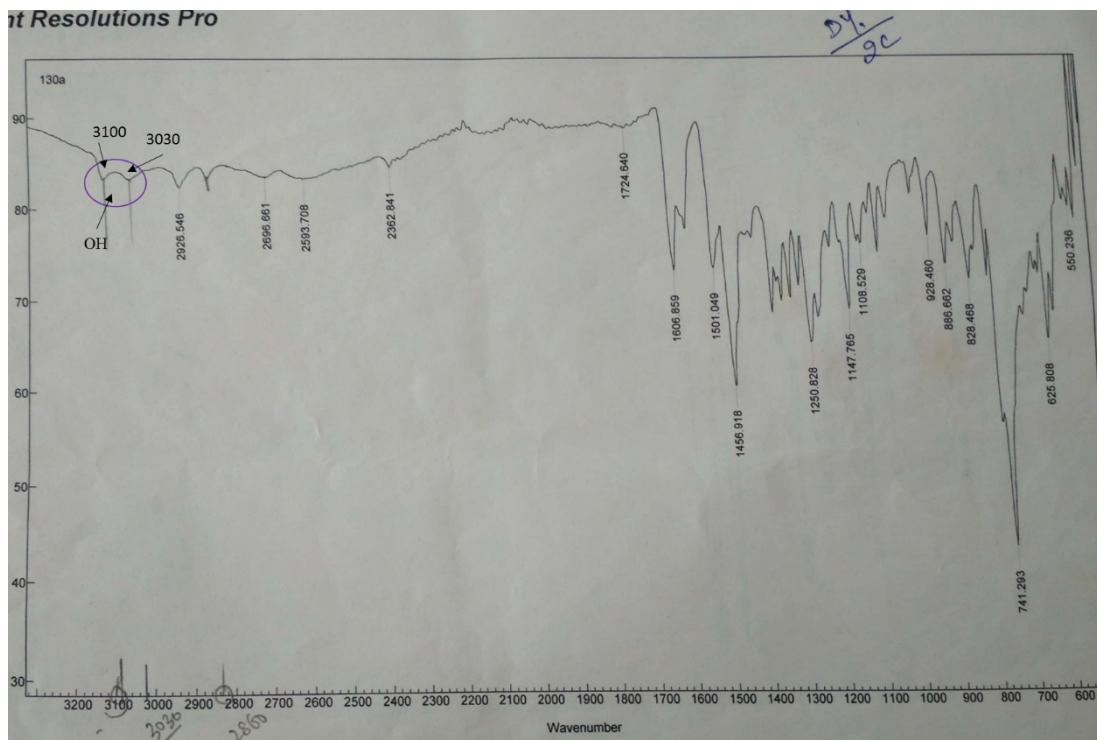

Figure S15: FTIR Spectra of compound 2A

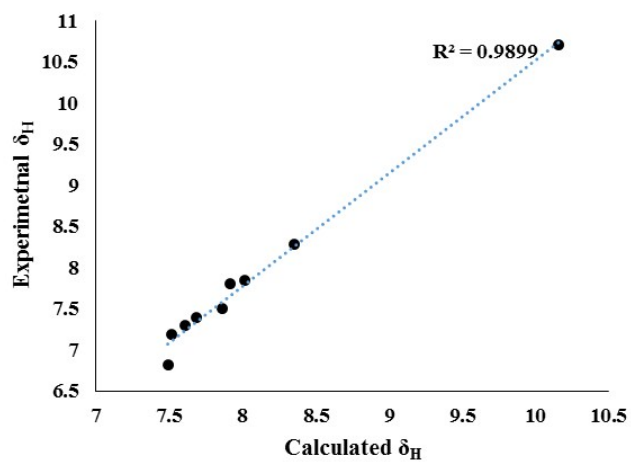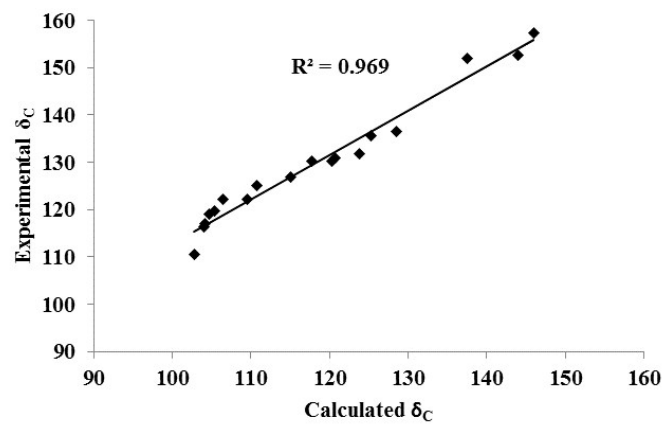

Figure S16:

Experimental and theoretical <sup>1</sup>H NMR (left) and <sup>13</sup>C NMR (right) correlation for conformer **2A**

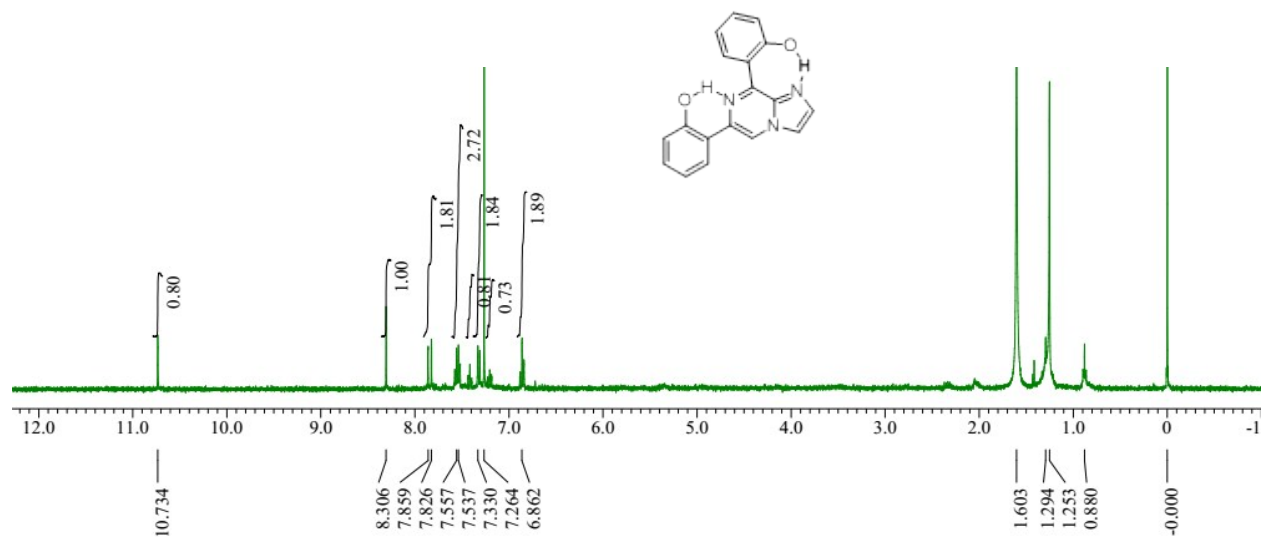

**Figure S17:**  $^1\text{H}$  NMR spectra of Compound **2B**

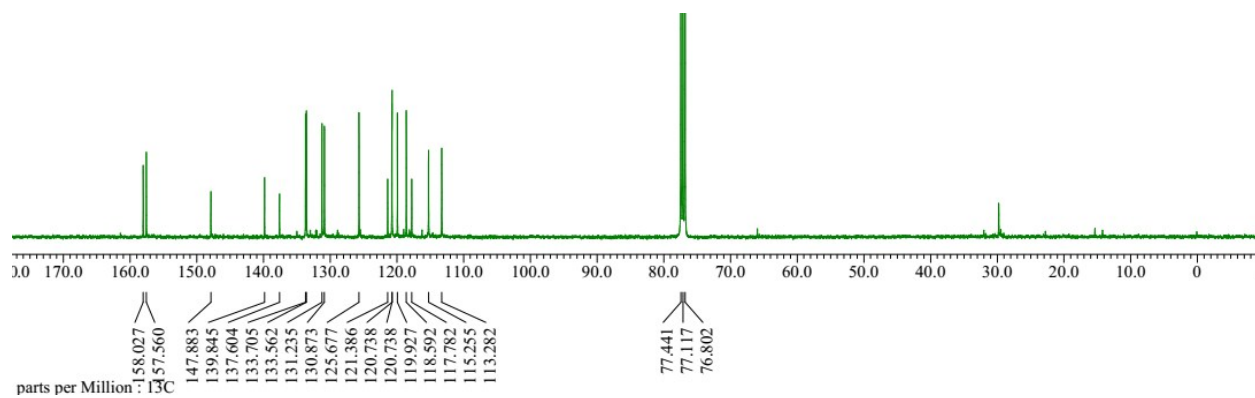

**Figure S18:**  $^{13}\text{C}$  NMR spectra of Compound **2B**

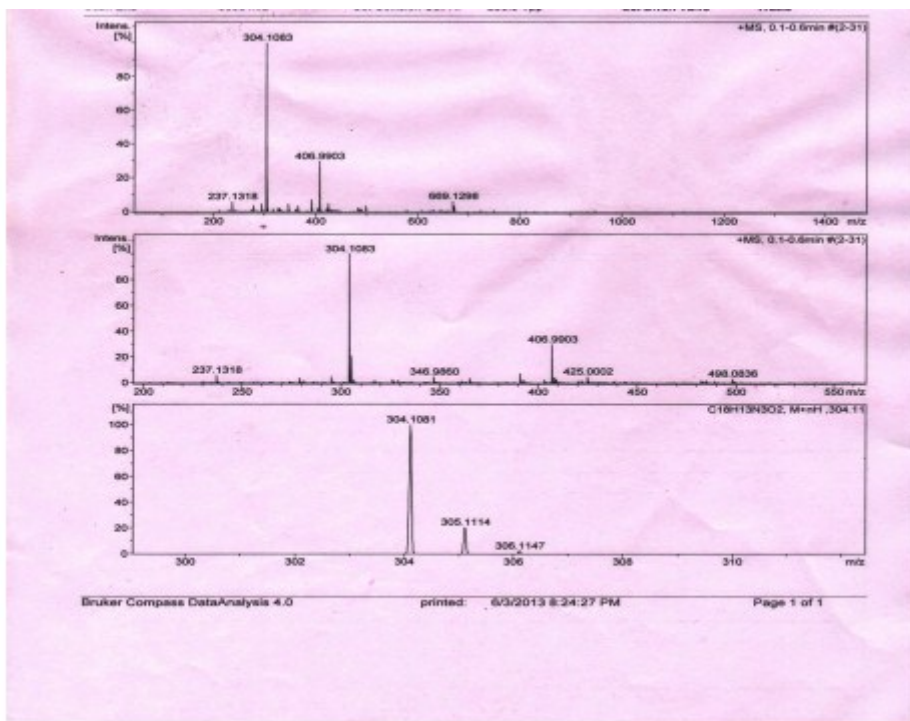

**Figure S19:** Mass spectra of compound **2B**

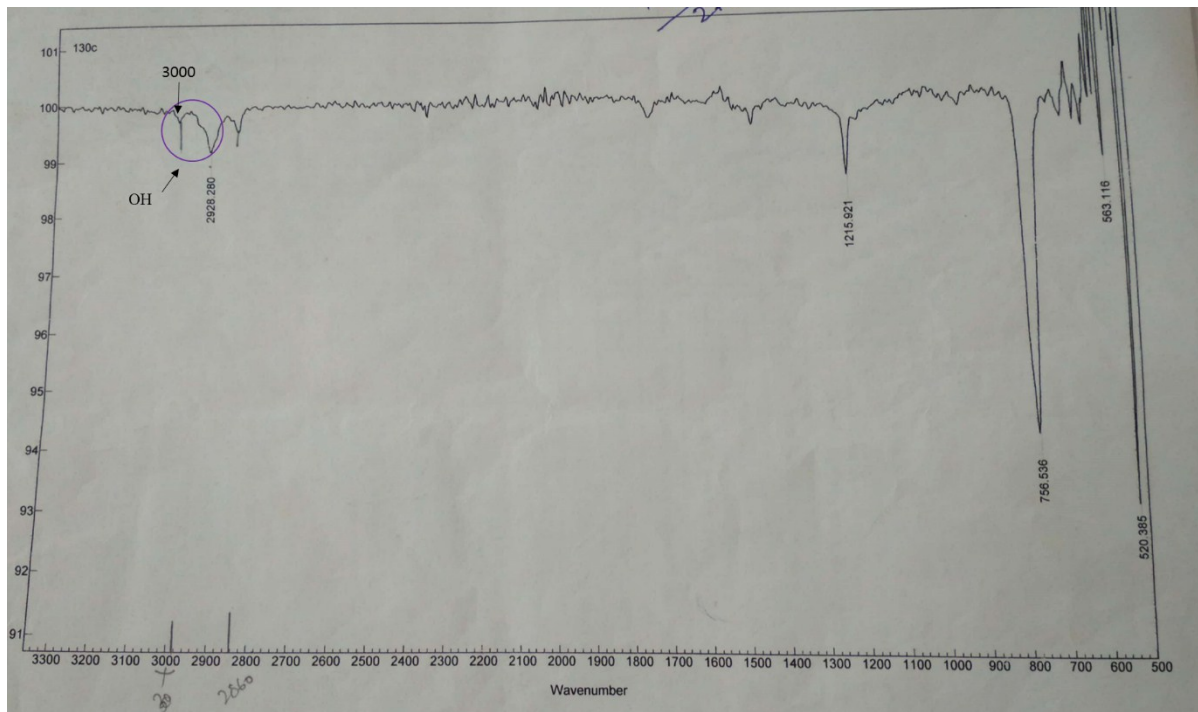

**Figure S20:** FTIR spectra of compound **2B**



**Table S3.** Experimental  $^1\text{H}$  NMR signals for conformer **2A** and **2B**

|     | 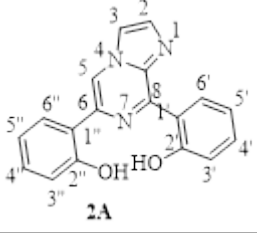<br><b>2A</b> | <br><b>2B</b> |
|-----|------------------------------------------------------------------------------------------------|--------------------------------------------------------------------------------------------------|
|     | <b>2A</b>                                                                                      | <b>2B</b>                                                                                        |
| 6'  | 8.59                                                                                           | 10.7                                                                                             |
| 5   | 8.29                                                                                           | 7.84                                                                                             |
| 2   | 7.88                                                                                           | 7.8                                                                                              |
| 3   | 7.65                                                                                           | 7.5                                                                                              |
| 4'  | 7.48                                                                                           | 7.39                                                                                             |
| 4'' | 7.33                                                                                           | 7.29                                                                                             |
| 6'' | 7.26                                                                                           |                                                                                                  |
| 3'  | 7.18                                                                                           |                                                                                                  |
| 3'' | 7.12                                                                                           |                                                                                                  |
| 5'  | 7.06                                                                                           | 7.18                                                                                             |
| 5'' | 6.97                                                                                           | 6.82                                                                                             |

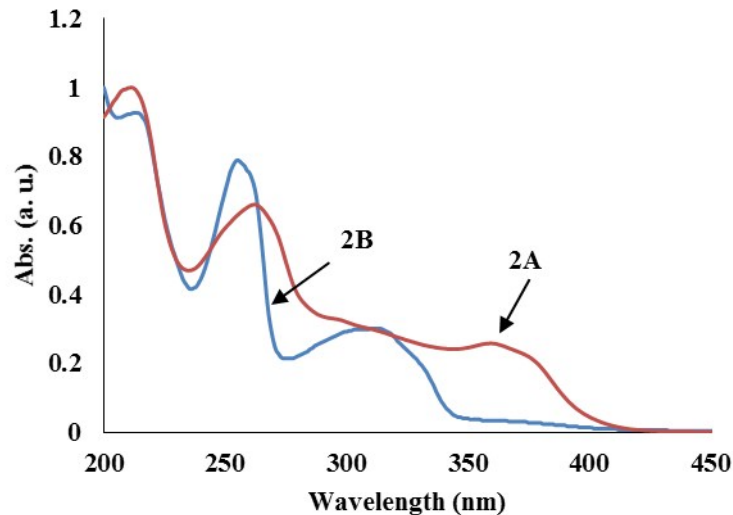**Figure S21:** The absorption spectra of different conformers **2A** and **2B** in  $\text{CH}_3\text{CN}$ .**Table S4:** The calculated absorption value for conformer **2A** and **2B** in gas and  $\text{CH}_3\text{CN}$  solvent phase at B3LYP/6-31++G\*\* level of theory, symmetry of frontier orbital and % contributions of Molecular orbitals

|            |                             |                             |                             | 2A            |           |                         |     |
|------------|-----------------------------|-----------------------------|-----------------------------|---------------|-----------|-------------------------|-----|
| Excitation | $\lambda_{\text{Gas}}$ (nm) | $\lambda_{\text{ACN}}$ (nm) | $\lambda_{\text{Exp}}$ (nm) | Osc. Strength | Symmetry  | Major orbital contribs. |     |
| $S_0-S_n$  |                             |                             |                             |               |           |                         |     |
| 1          | 387.15                      | 377.15                      | 380,                        | 0.1640        | Singlet-A | H→L                     | 96% |
| 2          | 375.78                      | 357.40                      | 360,                        | 0.0624        | Singlet-A | H-1→L                   | 98% |
| 3          | 326.38                      | 325.97                      | 265                         | 0.0625        | Singlet-A | H-2→L                   | 89% |
| 4          | 315.62                      | 313.60                      |                             | 0.1080        | Singlet-A | H-3→L                   | 63% |
| 5          | 297.45                      | 290.59                      |                             | 0.4008        | Singlet-A | H→L+1                   | 55% |
| 6          | 292.17                      | 286.91                      |                             | 0.2020        | Singlet-A | H-4→L                   | 81% |
|            |                             |                             |                             | 2B            |           |                         |     |
| 1          | 406.33                      | 391.19                      | 375,                        | 0.1003        | Singlet-A | H→L                     | 91% |
| 2          | 389.98                      | 362.46                      | 315,                        | 0.1141        | Singlet-A | H-1→L                   | 93% |
| 3          | 335.74                      | 329.86                      | 260                         | 0.073         | Singlet-A | H-2→L                   | 93% |
| 4          | 321.73                      | 317.88                      |                             | 0.1328        | Singlet-A | H→L+1                   | 80% |
| 5          | 306.73                      | 297.46                      |                             | 0.2859        | Singlet-A | H-1→L+1                 | 61% |
| 6          | 301.69                      | 292.03                      |                             | 0.2095        | Singlet-A | H-3→L                   | 59% |

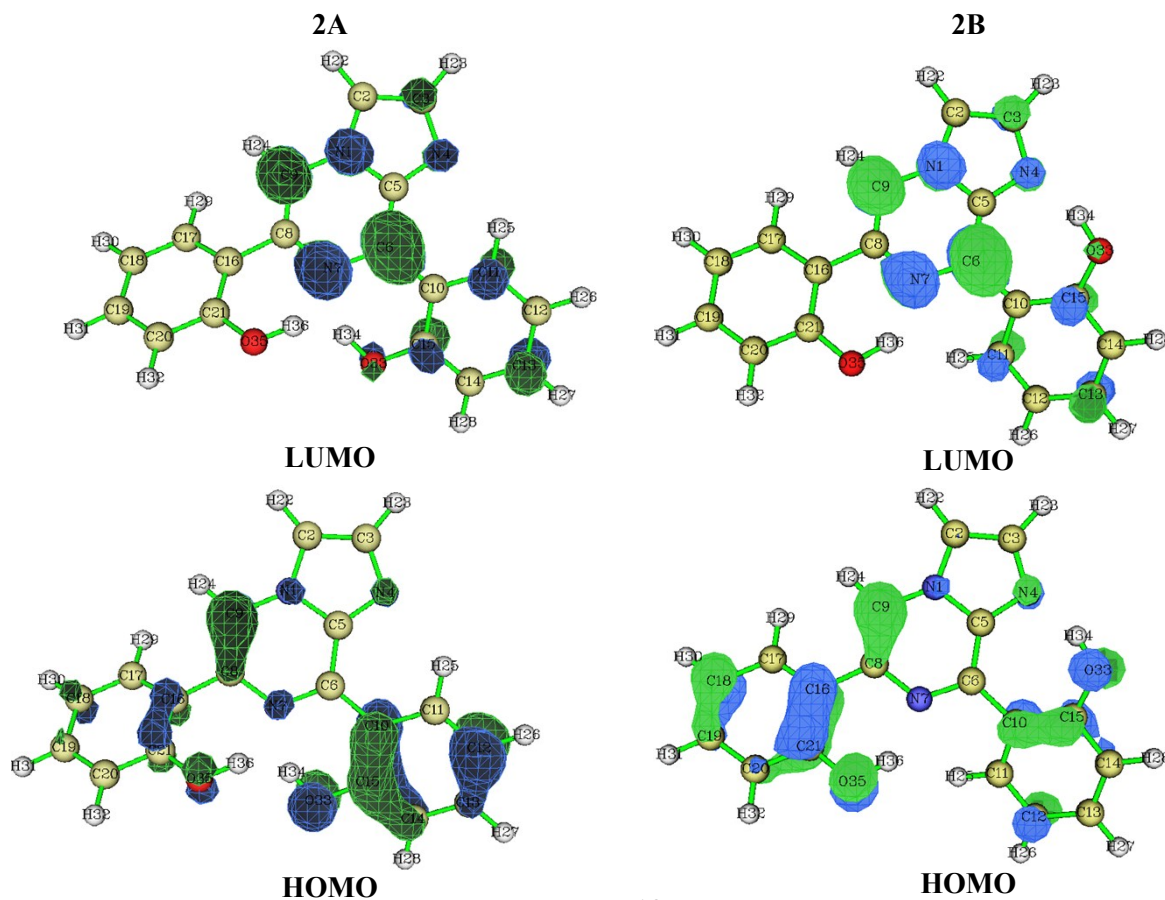

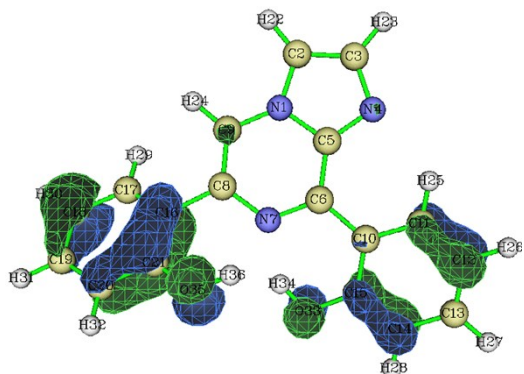

HOMO-1

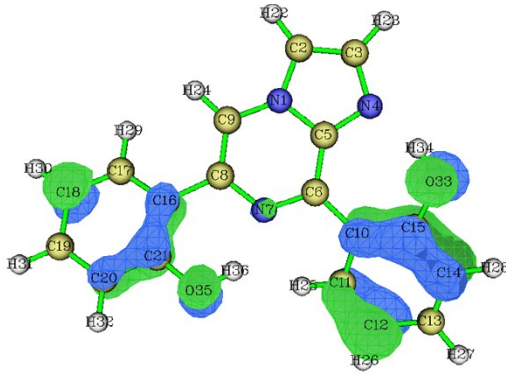

HOMO-1

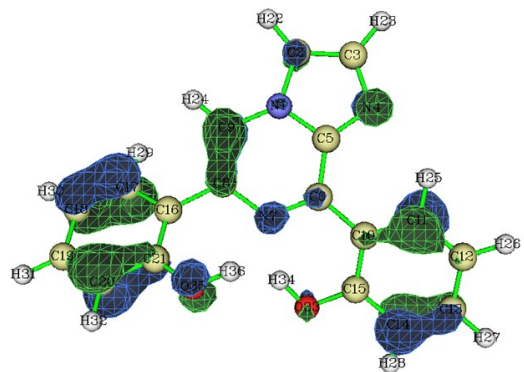

HOMO-2

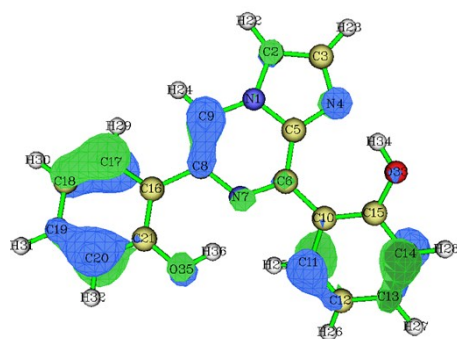

HOMO-2

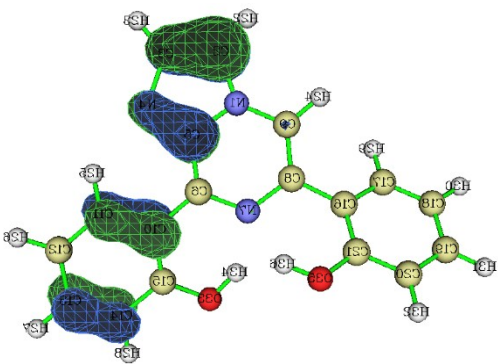

HOMO-3

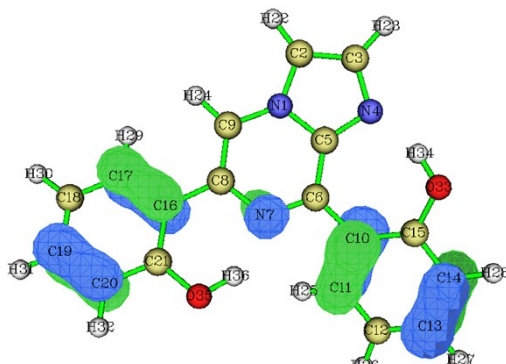

HOMO-3

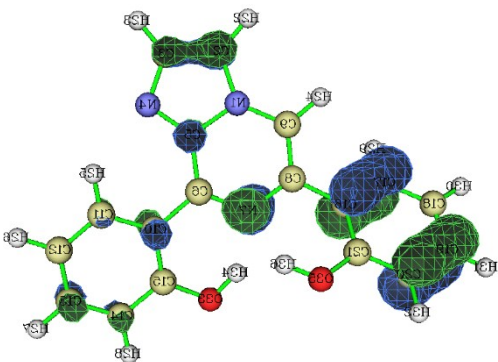

HOMO-4

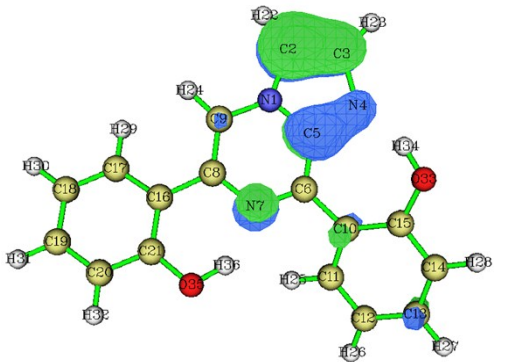

HOMO-4

Figure S22: Frontier Molecular orbital for conformer 2B

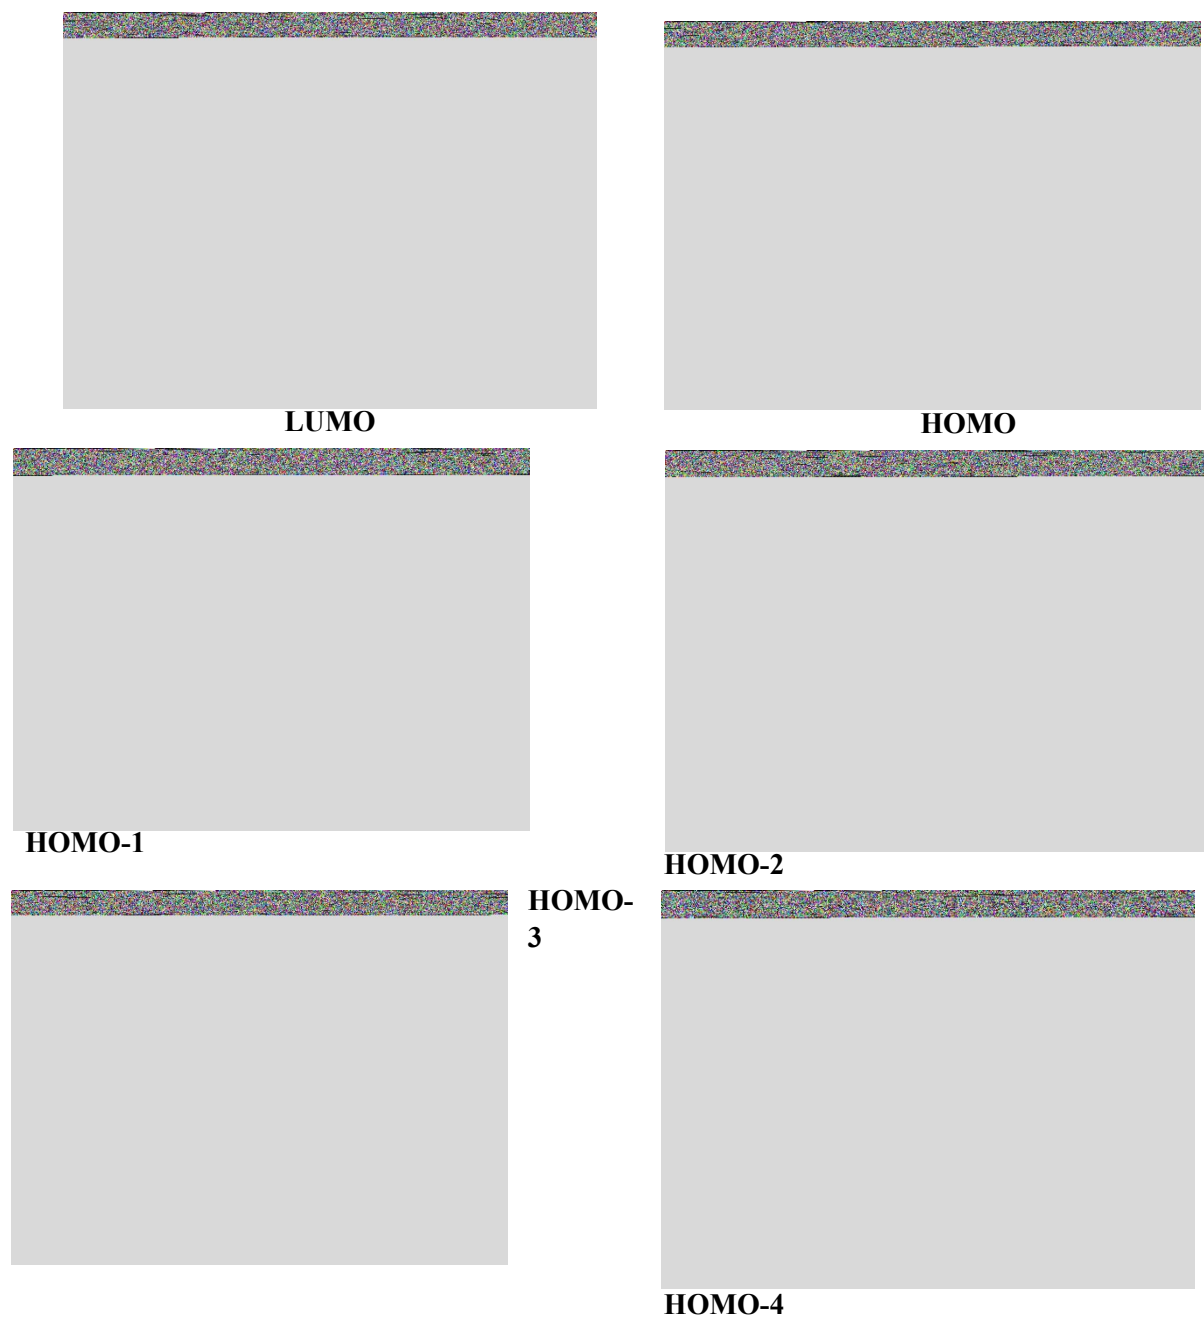

**Figure S23:** Frontier Molecular orbital for conformer **2A**
